# Supplementary material
Source: MDPI journal article supplement (https://www.mdpi.com/2673-1924/3/4/35)

# Using Stable Isotope Analyses to Assess the Trophic Ecology of Scleractinian Corals

Michael P. Lesser <sup>1,\*</sup>, Marc Slattery <sup>2</sup> and Keir J. Macartney <sup>1,†</sup>

<sup>1</sup> Department of Molecular, Cellular and Biomedical Sciences and School of Marine Science and Ocean Engineering, University of New Hampshire, Durham, NH 03824, USA

<sup>2</sup> Department of BioMolecular Sciences, Division of Pharmacognosy, University of Mississippi, Oxford, MS 38677, USA

\* Correspondence: mpl@unh.edu

† Present address: School of Earth, Environmental and Marine Sciences, University of Texas Rio Grande Valley, Port Isabel, TX 78958, USA

Figure S1. Logarithmic fit of gross primary production (GPP) versus depth for

*Montastraea cavernosa* from the Bahamas.

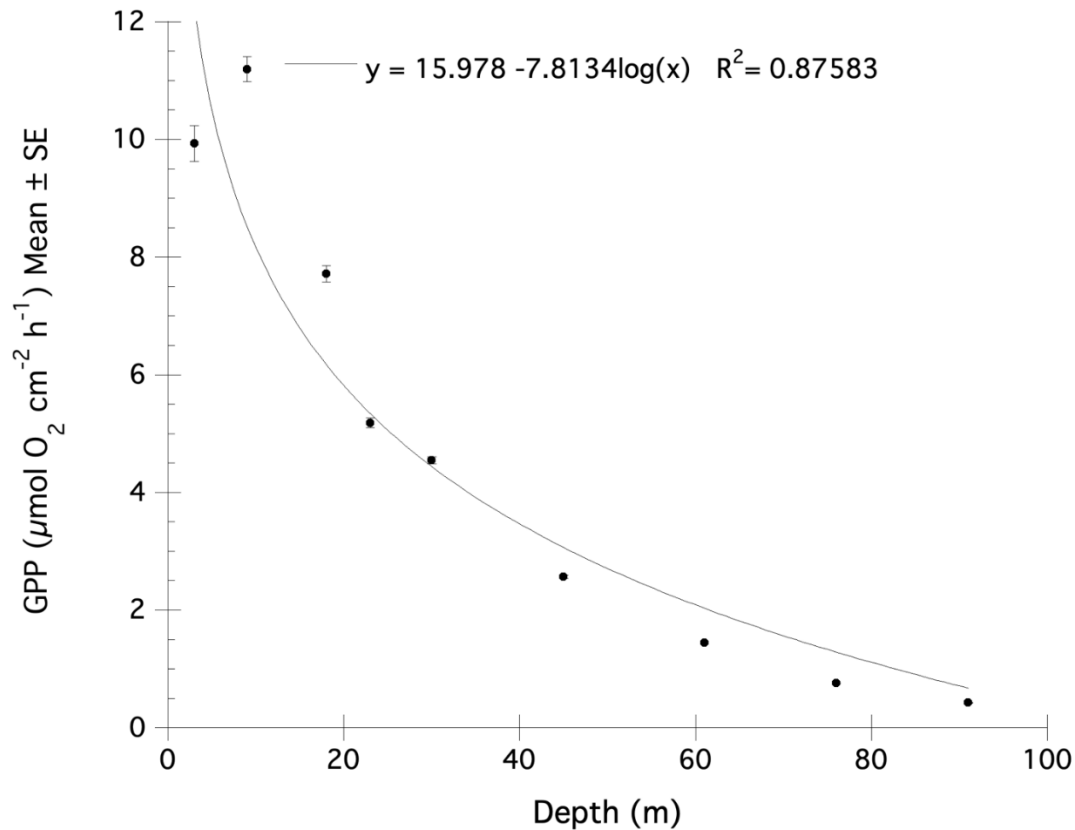

Figure S2. Linear regression of the  $\delta^{13}\text{C}$  and  $\delta^{18}\text{O}$  values for the coral skeleton of *Montastraea cavernosa* from the Bahamas.

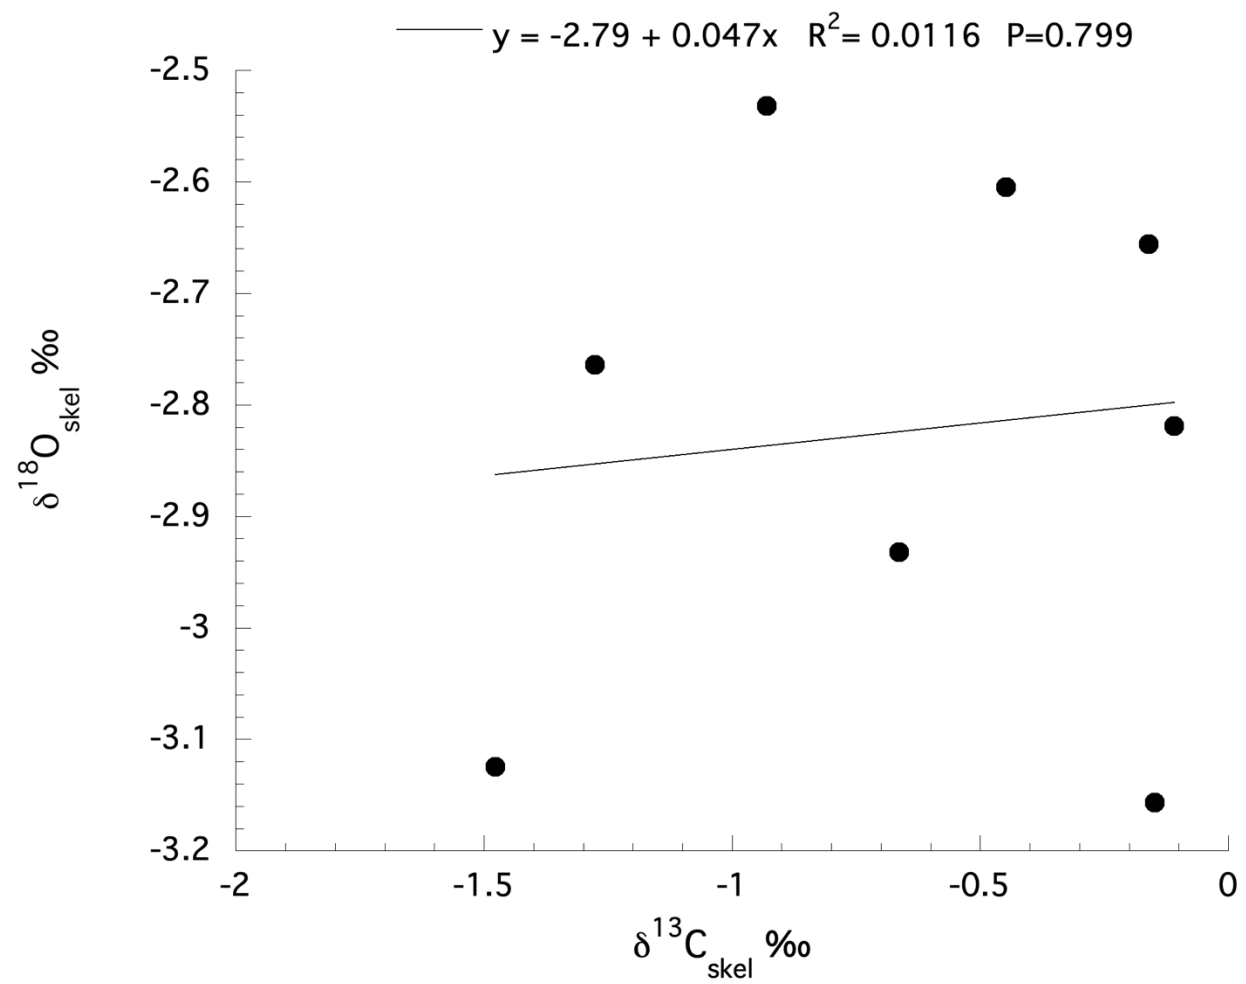

Supplement: s1 [file s1]
